# Supplementary material for: Infant and adult human intestinal enteroids are morphologically and functionally distinct
Source: PubMed Central journal article supplement (PMC11323560; doi:10.1128/mbio.01316-24), 2024-07-02
Supplement: mbio.01316-24-s0001.pdf [file mbio.01316-24-s0001.pdf]

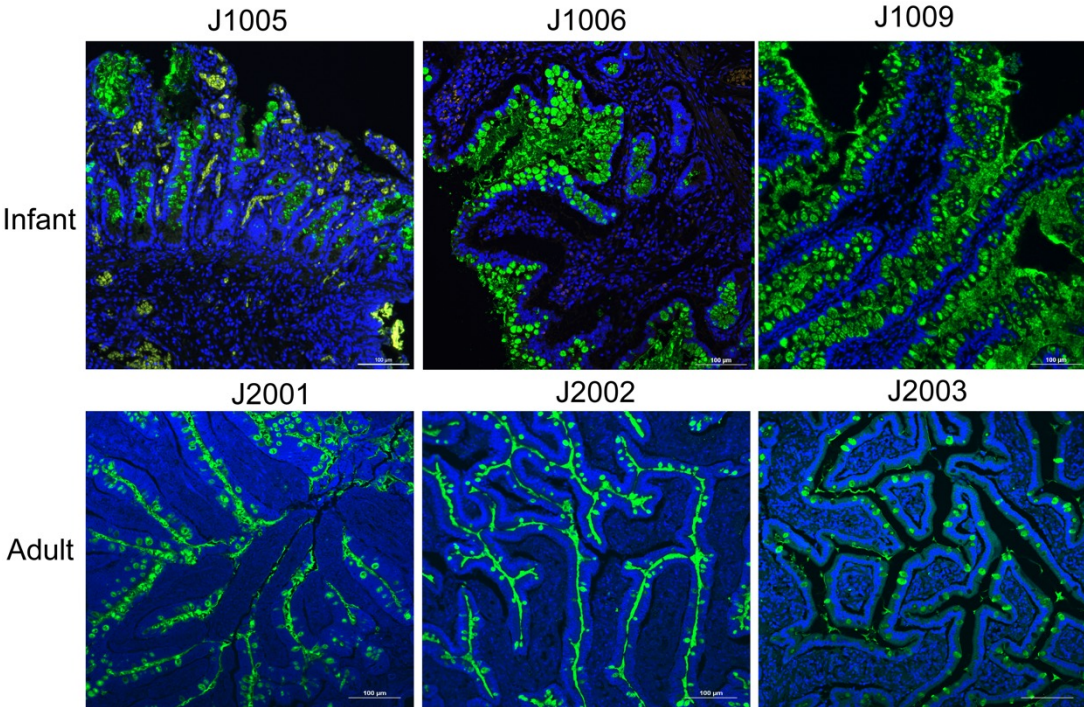

**Supplemental Figure 1: MUC2 expression is higher in infant intestinal tissues than adult tissues**

Representative confocal images of goblet cells (Muc2, green) in infant and adult tissues from two independent experiments. Nuclei were stained with DAPI (blue). Scale bar = 100 μm.
