# Supplementary material for: Infant and adult human intestinal enteroids are morphologically and functionally distinct
Source: PubMed Central journal article supplement (PMC11323560; doi:10.1128/mbio.01316-24), 2024-07-02
Supplement: mbio.01316-24-s0002.pdf [file mbio.01316-24-s0002.pdf]

**A****Differentiated  
Monolayers**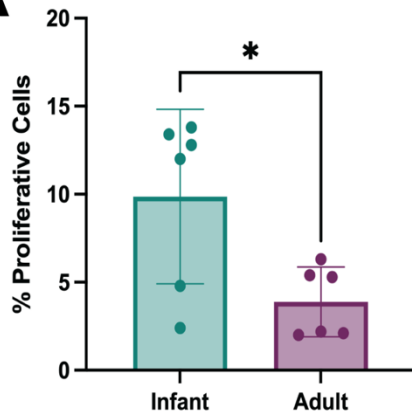**B**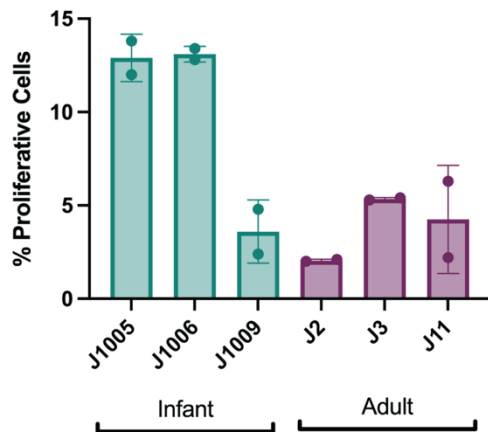**C****Undifferentiated  
Monolayers**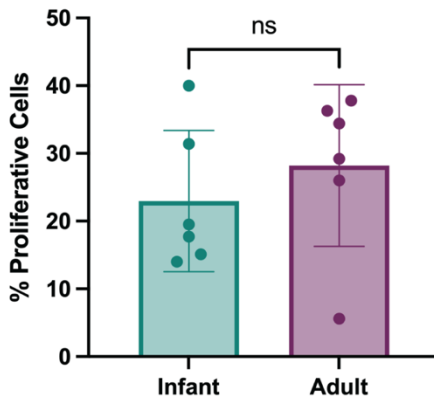**D**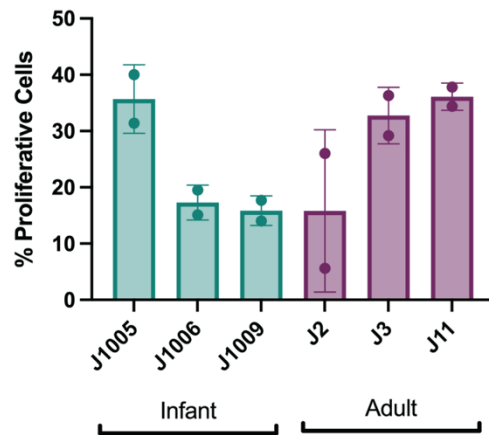

**Supplemental Figure 2: There are few proliferating cells in differentiated infant and adult HIE monolayers on transwells**

Percentage of EdU-positive cells quantified by flow cytometry in differentiated (A) and undifferentiated (C) HIE monolayers. B&D: Percentage of EdU-positive cells quantified by flow cytometry in individual lines. Data represents mean  $\pm$  standard deviation (SD) from two independent experiments, with each experiment including the three infant and three adult HIE lines.
