# Supplementary material for: Infant and adult human intestinal enteroids are morphologically and functionally distinct
Source: PubMed Central journal article supplement (PMC11323560; doi:10.1128/mbio.01316-24), 2024-07-02
Supplement: mbio.01316-24-s0003.pdf [file mbio.01316-24-s0003.pdf]

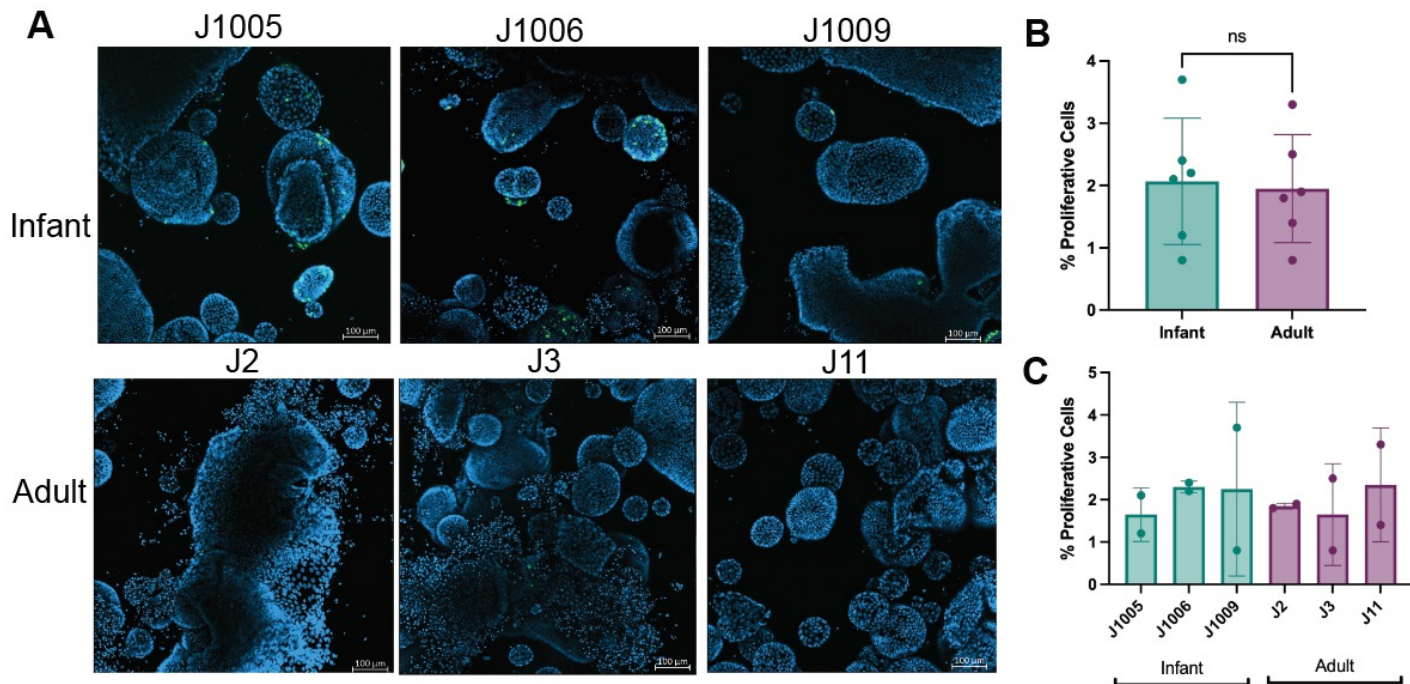

**Supplemental Figure 3: There are few proliferating cells in differentiated infant and adult 3D HIEs**

A: Representative confocal 3D reconstruction images after 24h 5-ethynyl-2'-deoxyuridine (EdU) incorporation in differentiated infant and adult HIEs. B: Percentage of EdU-positive cells quantified by flow cytometry. C: Percentage of EdU-positive cells quantified by flow cytometry in individual lines. Data represents mean  $\pm$  SD from two independent experiments, with each experiment including the three infant and three adult HIE lines. The  $p$ -values were calculated by student's t-test.
