# Supplementary material for: Infant and adult human intestinal enteroids are morphologically and functionally distinct
Source: PubMed Central journal article supplement (PMC11323560; doi:10.1128/mbio.01316-24), 2024-07-02
Supplement: mbio.01316-24-s0004.pdf [file mbio.01316-24-s0004.pdf]

**A**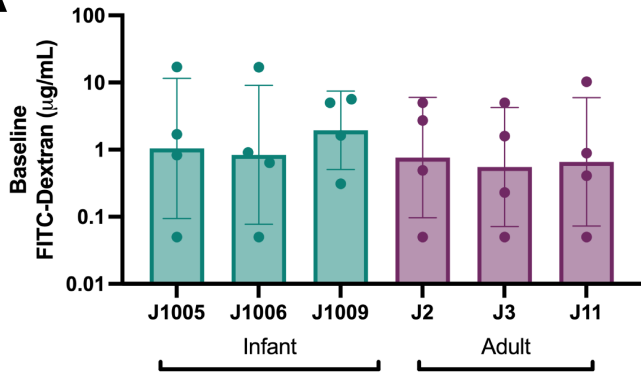**B**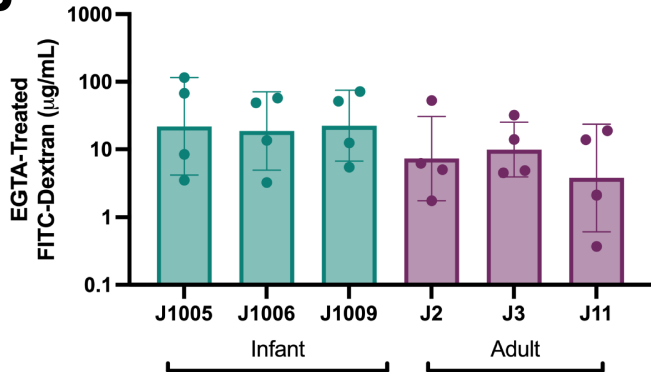

### Supplemental Figure 4: FITC-Dextran concentration in response to EGTA treatment by line

Concentration of 4kDA FITC-Dextran in each HIE line at (A) baseline and (B) after EGTA treatment. Data represent mean  $\pm$  SD from four independent experiments, with each experiment including the three infant and three adult HIE lines.
