# Supplementary material for: Infant and adult human intestinal enteroids are morphologically and functionally distinct
Source: PubMed Central journal article supplement (PMC11323560; doi:10.1128/mbio.01316-24), 2024-07-02
Supplement: mbio.01316-24-s0005.pdf [file mbio.01316-24-s0005.pdf]

**A**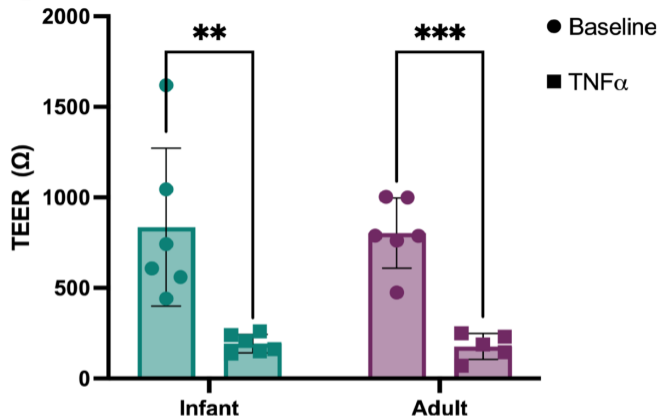**B**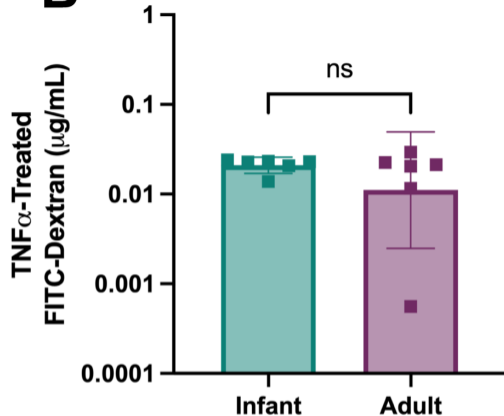

**Supplemental Figure 5: TNF $\alpha$  causes changes in TEER in both infant and adult HIEs.**

A: TEER values of HIEs at baseline and after TNF $\alpha$  treatment. B: Concentration of 4kDa FITC-Dextran after TNF $\alpha$  treatment. Data represent mean  $\pm$  SD from two independent experiments, with each experiment including the three infant and three adult HIE lines. The p-values were calculated by student's t-test, and the asterisks (\*\*) and (\*\*\*) represent  $p < 0.01$ , and  $p < 0.001$  respectively
