# Supplementary material for: Infant and adult human intestinal enteroids are morphologically and functionally distinct
Source: PubMed Central journal article supplement (PMC11323560; doi:10.1128/mbio.01316-24), 2024-07-02
Supplement: mbio.01316-24-s0006.pdf [file mbio.01316-24-s0006.pdf]

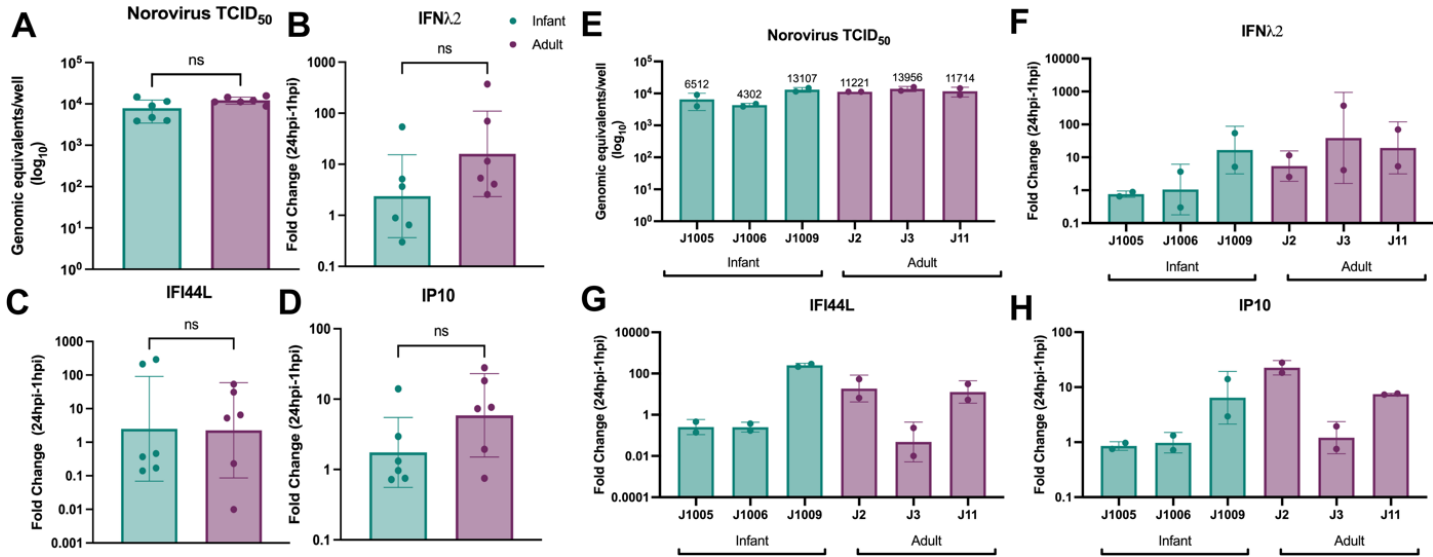

### Supplemental Figure 6: HuNoV tissue culture infectious dose 50 (TCID<sub>50</sub>) and innate immune response to HuNoV infection

A: HuNoV (GII.4) tissue culture infectious dose 50 (TCID<sub>50</sub>) in HIEs at 24hpi. Quantification of (B) IFNλ<sub>2</sub>, (C) IFI44L, and (D) IP10 transcripts in response to infection with 100 TCID<sub>50</sub>s of HuNoV. E-H: There are HIE line specific differences in HuNoV TCID<sub>50</sub> (E) and innate immune response to HuNoV infection (F-H). Data represent mean ± SD from two independent experiments, with each experiment including the three infant and three adult HIE lines. The p-values were calculated by student's t-test.
