# Supplementary material for: Infant and adult human intestinal enteroids are morphologically and functionally distinct
Source: PubMed Central journal article supplement (PMC11323560; doi:10.1128/mbio.01316-24), 2024-07-02
Supplement: mbio.01316-24-s0008.pdf [file mbio.01316-24-s0008.pdf]

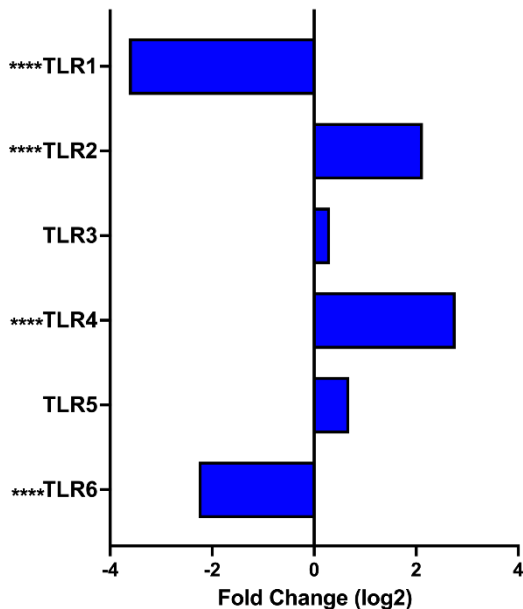

**Supplemental Figure 8: Expression of some toll-like receptors (TLRs) are significantly different in infant HIEs**

Expression profile of RNA-seq data for TLR genes. Data represents mean values and are expressed as Log2 fold change, the asterisk (\*\*\*\*) represents  $p < 0.0001$ .
