# Supplementary material for: Infant and adult human intestinal enteroids are morphologically and functionally distinct
Source: PubMed Central journal article supplement (PMC11323560; doi:10.1128/mbio.01316-24), 2024-07-02
Supplement: mbio.01316-24-s0009.pdf [file mbio.01316-24-s0009.pdf]

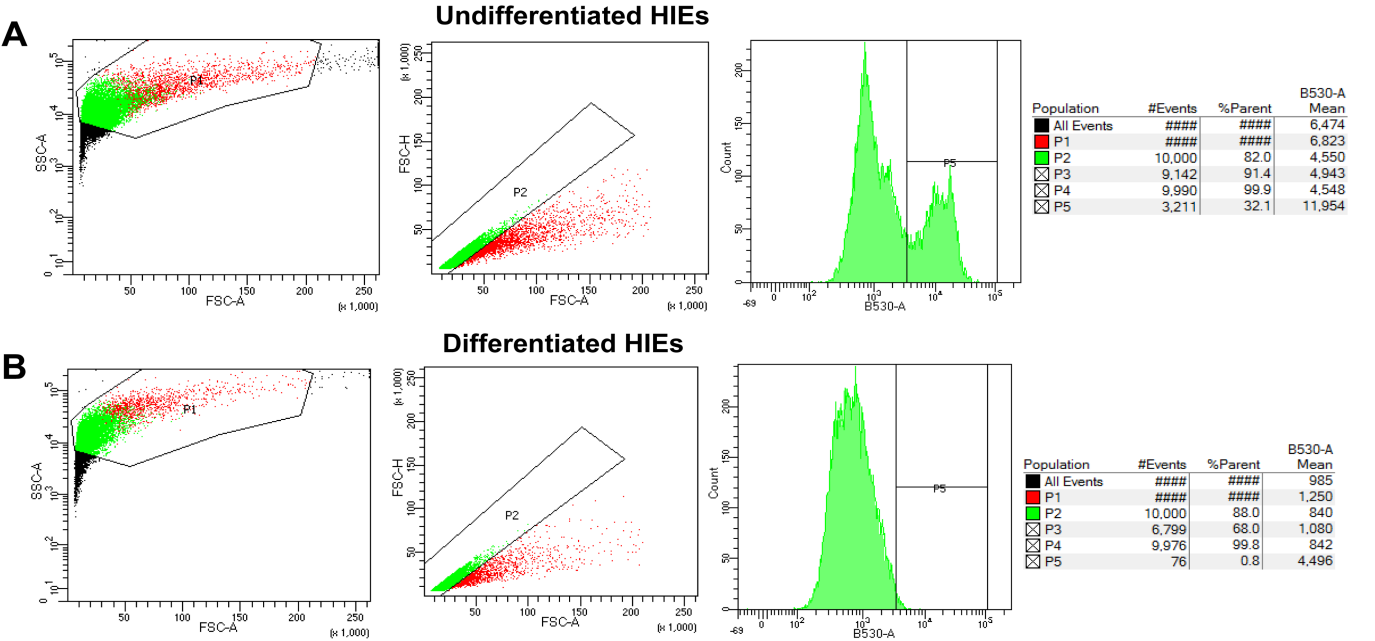

**Supplemental Figure 9: Representative EdU gating strategy for undifferentiated (A) and differentiated (B) HIEs**
