# Supplementary material for: Infant and adult human intestinal enteroids are morphologically and functionally distinct
Source: PubMed Central journal article supplement (PMC11323560; doi:10.1128/mbio.01316-24), 2024-07-02
Supplement: mbio.01316-24-s0010.pdf [file mbio.01316-24-s0010.pdf]

| <b>GeneID</b>   | <b>GeneSymbol</b> | <b>GeneBiotype</b> | <b>logFC</b> | <b>PValue</b> | <b>FDR</b> |
|-----------------|-------------------|--------------------|--------------|---------------|------------|
| ENSG00000104067 | TJP1              | Protein coding     | 0.000        | 0.999         | 1.000      |
| ENSG00000119139 | TJP2              | Protein coding     | -0.292       | 0.511         | 0.780      |
| ENSG00000105289 | TJP3              | Protein coding     | -0.500       | 0.046         | 0.186      |
| ENSG00000197822 | OCLN              | Protein coding     | 0.139        | 0.578         | 0.827      |
| ENSG00000163347 | CLDN1             | Protein coding     | -1.966       | 0.000         | 0.000      |
| ENSG00000165376 | CLDN2             | Protein coding     | 4.368        | 0.000         | 0.000      |
| ENSG00000165215 | CLDN3             | Protein coding     | 0.440        | 0.129         | 0.370      |
| ENSG00000189143 | CLDN4             | Protein coding     | -0.200       | 0.455         | 0.740      |
| ENSG00000181885 | CLDN7             | Protein coding     | 0.122        | 0.649         | 0.862      |
| ENSG00000157224 | CLDN12            | Protein coding     | -0.544       | 0.031         | 0.140      |
| ENSG00000106404 | CLDN15            | Protein coding     | 0.795        | 0.002         | 0.015      |
| ENSG00000113946 | CLDN16            | Protein coding     | -1.918       | 0.003         | 0.023      |
| ENSG00000066405 | CLDN18            | Protein coding     | -3.358       | 0.000         | 0.000      |
| ENSG00000253958 | CLDN23            | Protein coding     | -1.437       | 0.000         | 0.000      |

### **Supplemental table 1A**

RNA Sequencing data on tight junction proteins expressed in infant over adult HIEs.

| <b>Main Figure Number</b> | <b>Infant lines</b> | <b>Adult lines</b> |
|---------------------------|---------------------|--------------------|
| 1                         | 5-24                | 11-21              |
| 2                         | 7-12                | 17-20              |
| 3                         | 12-21               | 5-40               |
| 4                         | 2-11                | 11-28              |
| 5                         | 2-45                | 17-25              |
| 6                         | 2-45                | 6-25               |
| 7                         | 10-14               | 19-22              |

**Supplemental table 1B:** Passage number range of HIEs used in primary figures.
